# Supplementary material
Source: PubMed Central journal article supplement (PMC6445711)
Supplement: NIHMS1516798-supplement-1.pdf [file NIHMS1516798-supplement-1.pdf]

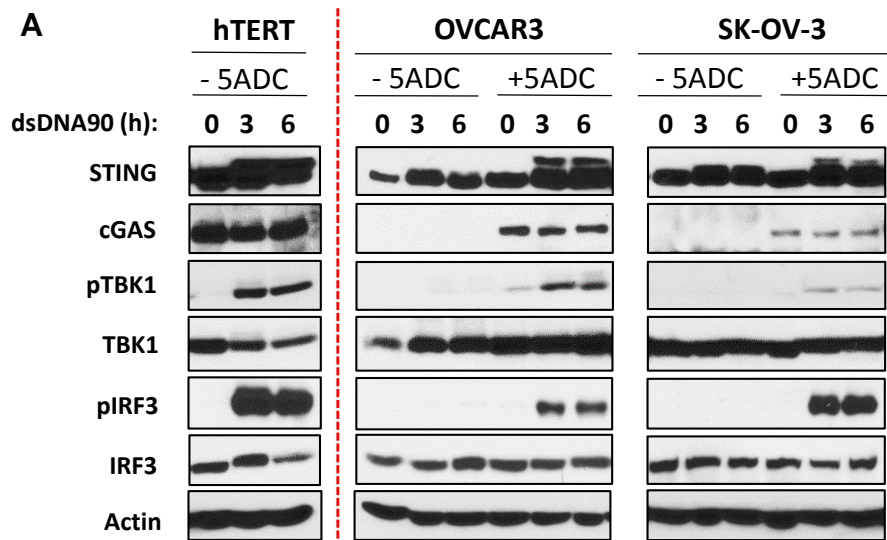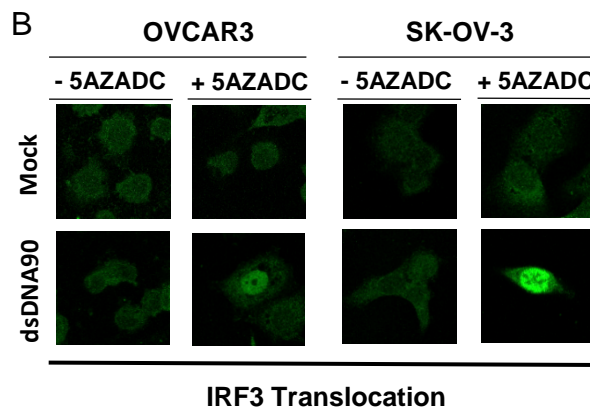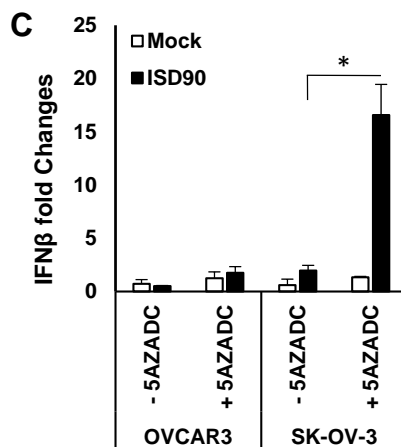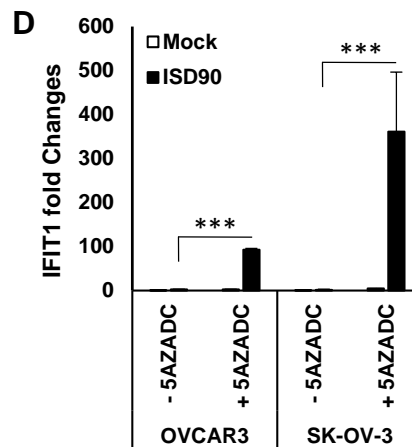

### Supplementary Figure 1.

Demethylation treatment in cGAS deficient ovarian cancer cell lines. **A**, Immunoblot analysis of STING signal activation in hTERT control cells and ovarian cancer cells deficient in cGAS (OVCAR3 and SK-OV-3) mock or treated with 10  $\mu$ M 5-aza-2'-deoxycytidine (5AZADC) for 4 days, followed by dsDNA90 transfection at 3  $\mu$ g/ml for the indicated time periods. **B**, Immunofluorescence microscopy analysis of IRF3 translocation in ovarian cancer cells treated with 5AZADC (same as above) followed by dsDNA90 transfection at 3  $\mu$ g/ml for 3 hours. **C**, Ovarian cancer cells mock treated or treated with 10  $\mu$ M 5AZADC for 4 days, followed by dsDNA90 transfection at 3  $\mu$ g/ml for 6 hours. human IFN- $\beta$  expression was analyzed by qPCR. **D**, qPCR analysis of human IFIT1 expression in ovarian cancer cells (same as in C). Error bars indicate SD. \* $p < 0.05$ , \*\* $p < 0.01$ , and \*\*\* $p < 0.001$ ; Student's t test.
