# Supplementary material
Source: PubMed Central journal article supplement (PMC6445711)
Supplement: NIHMS1516798-supplement-2.pdf [file NIHMS1516798-supplement-2.pdf]

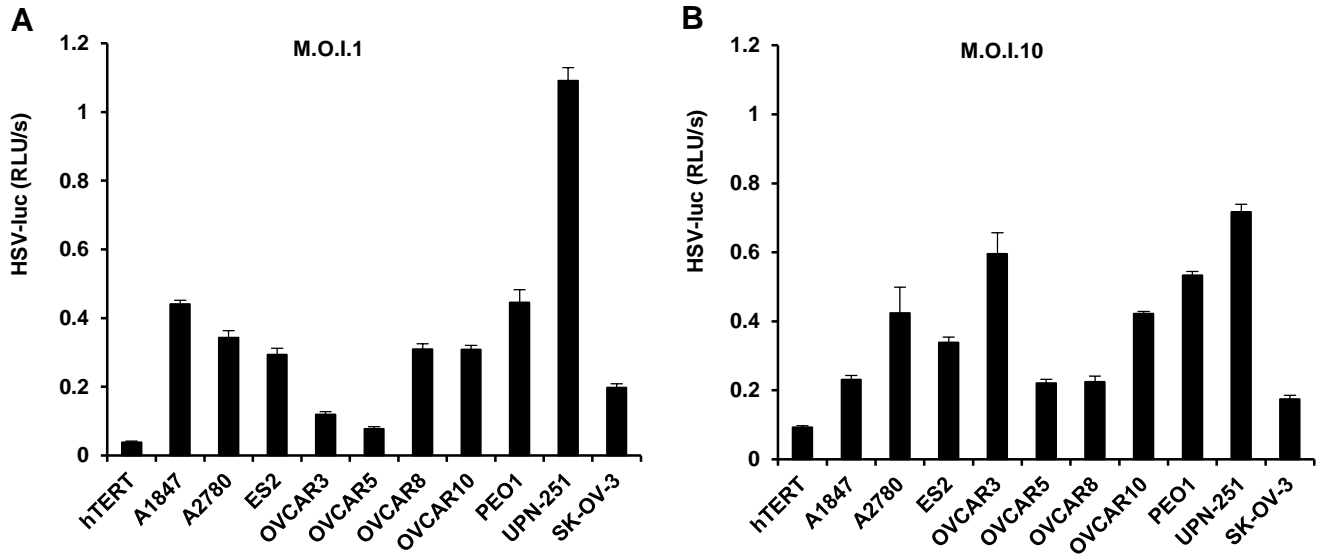

**Supplementary Figure 2.**

Ovarian cells infected with HSV1 expressing luciferase (HSV-luc). Normal human hTERT cells and human ovarian cancer cell lines were infected with HSV-luc (not deficient for  $\gamma$ 34.5 protein) at the M.O.I. 1 (**A**) or M.O.I. 10 (**B**) for 24 h and then cell lysates were analyzed by luciferase assay. RLU, relative light units. Data are representative of at least two independent experiments.
