# Supplementary material
Source: PubMed Central journal article supplement (PMC6445711)
Supplement: NIHMS1516798-supplement-3.pdf [file NIHMS1516798-supplement-3.pdf]

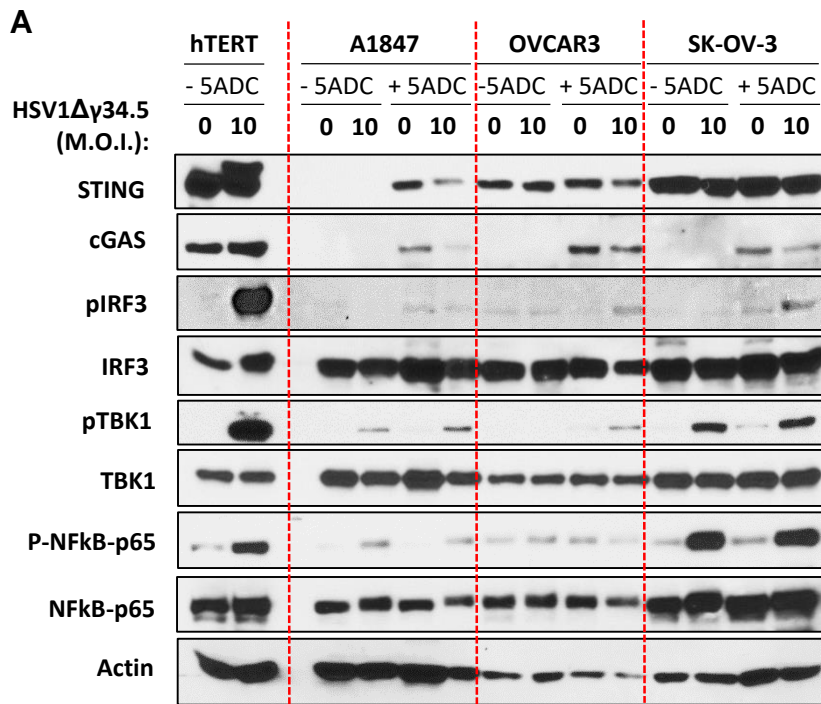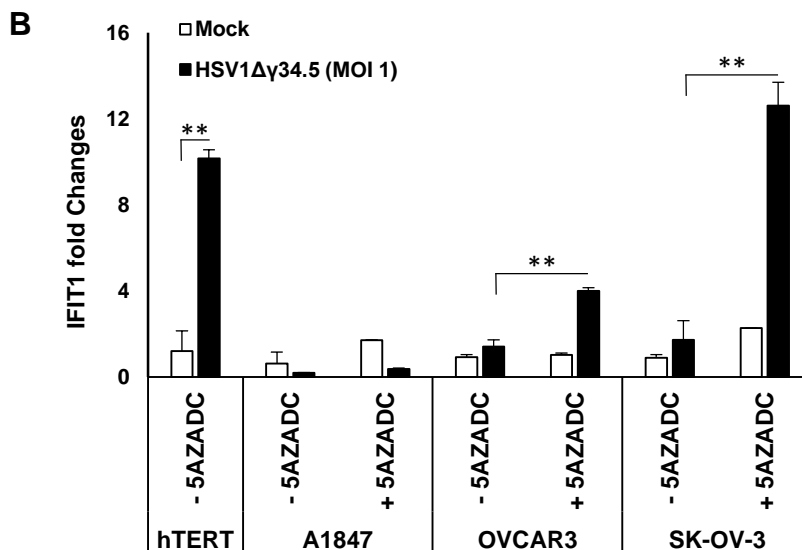

**Supplementary Figure 3.**

HSV1Δγ34.5 infection after 5AZADC treatment in STING and/or cGAS deficient ovarian cancer cell lines. **A**, Immunoblot analysis of STING signal activation in hTERT control cells and ovarian cancer cells deficient in STING and cGAS (A1847) or only cGAS (OVCAR3 and SK-OV-3) mock or treated with 10 μM 5-aza-2'-deoxycytidine (5AZADC) for 4 days, followed by HSV1Δγ34.5 infection at M.O.I. 10 for 1 hour and analysed 4 hours post infection by immunoblot. **B**, Same cells as above were infected with HSV1Δγ34.5 at M.O.I. 1 for 1 hour and samples collected 6 hours post infection to check RNA expression by qPCR for IFIT1. Error bars indicate SD. \*p < 0.05, \*\*p < 0.01, and \*\*\*p < 0.001; Student's t test.
