# Supplementary material
Source: PubMed Central journal article supplement (PMC6445711)
Supplement: NIHMS1516798-supplement-4.pdf [file NIHMS1516798-supplement-4.pdf]

**Table 1 - Ovarian cancer cell lines description**

| <b>Name</b>       | <b>References</b> | <b>Morphology</b> | <b>Disease</b>                      |
|-------------------|-------------------|-------------------|-------------------------------------|
| <b>A1847</b>      | Johnson, 1997     | Unknown           | Human ovarian carcinoma             |
| <b>A2780</b>      | Johnson, 1997     | Epithelial        | Human ovarian carcinoma             |
| <b>ES2</b>        | CRL-1978 (ATCC)   | Fibroblast        | Human ovarian clear cell carcinoma  |
| <b>OVCAR3</b>     | HTB-161 (ATCC)    | Epithelial        | Human ovarian adenocarcinoma        |
| <b>OVCAR4</b>     | Johnson, 1997     | Epithelial        | Human ovarian serous adenocarcinoma |
| <b>OVCAR5</b>     | Johnson, 1997     | Epithelial        | Human ovarian carcinoma             |
| <b>OVCAR8</b>     | Johnson, 1997     | Epithelial        | Human ovarian serous adenocarcinoma |
| <b>OVCAR10</b>    | Johnson, 1997     | Epithelial        | Human ovarian adenocarcinoma        |
| <b>PEO1</b>       | Johnson, 1997     | Epithelial        | Human ovarian adenocarcinoma        |
| <b>UPN251-515</b> | Johnson, 1997     | Unknown           | Human ovarian carcinoma             |
| <b>SKOV3</b>      | HTB-77 (ATCC)     | Epithelial        | adenocarcinoma                      |
